# Supplementary material
Source: PubMed Central journal article supplement (PMC4116589)
Supplement: me-14-1100.pdf [file me-14-1100.pdf]

**Supplemental Table S1: Antibodies and reagents for Immuno blots and Immuno-histochemistry**

| <b>Protein</b>                               | <b>Company Antibodies</b> | <b>Cat. Number</b> |
|----------------------------------------------|---------------------------|--------------------|
| Id4                                          | Aviva biosystem           | ARP38058-T100      |
| Id4                                          | Biocheck                  | BCH-9/82-12        |
| Id1                                          | Santa Cruz Biotechnology  | SC-133103          |
| CD31                                         | thermoscientific          | MA1-80069          |
| Ki67                                         | abcam                     | ab15580            |
| Lamin                                        | abcam                     | EPR4100            |
| TXNIP                                        | abnova                    | PAB22506           |
| NUPR1                                        | Biorbyt                   | orb101189          |
| DDIT3                                        | Abnova                    | PAB18326           |
| AR                                           | Santa Cruz Biotechnology  | Sc-816             |
| PSA                                          | santa cruz biotechnology  | Sc-7638            |
| TOPO                                         | santa cruz biotechnology  | Sc-271285          |
| NKX3.1                                       | thermoscientific          | MA1-16906          |
| GAPDH                                        | Cell Signalling           | #51745             |
| p21                                          | Cell Signalling           | #2947              |
| gaot anti-rabbit Secondary Antibody          | Thermoscientific          | #32460             |
| <b>ICC secondary antibodies and reagents</b> |                           |                    |
| DyLight 594 goat anti-mouse (red)            | Thermoscientific          | #35510             |
| DyLight 488 goat anti-rabbit (green)         | Thermoscientific          | #35552             |
| DyLight 594 goat anti-rabitt (red)           | Thermoscientific          | #35560             |
| DyLight 488 goat anti-mouse (green)          | Thermoscientific          | #35502             |
| DAPI (Pro-long Anti-fade)                    | Invitrogen                | #P36935            |

Supplemental Table S2: Quantitative RT-PCR primer sequences

| <b>Gene</b> | <b>5'Primer</b>                | <b>3'Primer</b>               |
|-------------|--------------------------------|-------------------------------|
| mmp2        | 5' CCGTGGTGAGATCTTCTTCTTC 3'   | 5' GGTTCTCCAGCTTCAGGTAATAG 3' |
| mmp13       | 5' TATCCGAGACTAATAGAAGAAGAC 3' | 5' GGAATTTGCTGGCATGACG 3'     |
| TXNIP       | 5'GATCACCGATTGGAGAGCCC         | 5'TGCAGGGATCCACCTCAGTA        |
| NUPR1       | 5'GAAGACAAGCCAGGCACGAT         | 5'ATGATGAGAGGCCCGAGGTA        |
| DDIT3       | 5'TTCTCTGGCTTGGCTGACTG         | 5'TTCTCTGGCTTGGCTGACTG        |
| AR          | 5'AGTGCTGTACAGGAGCCGAA         | 5'AGGCACTTTCCTTGCTTCT         |
| PSA         | 5'TTTCAGGTCAGCCACAGCTT         | 5'GGTCCATGACCTTCACAGCA        |

Supplemental Table S3: Pathways identified by IPA Upstream Regulator Analysis

| Upstream Regulator | Log Ratio | Molecule Type                   | Predicted Activation State | Activation z-score | p-value of overlap | Target molecules in dataset                       |
|--------------------|-----------|---------------------------------|----------------------------|--------------------|--------------------|---------------------------------------------------|
| metribolone        |           | chemical reagent                | Activated                  | 2.195              | 8.21E-06           | GDF15, LDLR, NDRG1, S100P, SAT1                   |
| NUPR1              | 1.581     | transcription regulator         | Activated                  | 2.449              | 5.96E-05           | ALDOC, DDIT3, GDF15, HIST1H1B, NDRG1, NUPR1, SAT1 |
| decitabine         |           | chemical drug                   | Activated                  | 2.195              | 1.94E-03           | CDKN1C, GDF15, LDLR, NDRG1, SAT1                  |
| tretinoin          |           | chemical - endogenous mammalian | Activated                  | 2.262              | 1.85E-02           | ALDH1A3, CDCA7, DDIT3, GDF15, ID3, NDRG1, PTMA    |
